# Supplementary material for: 1D iron(ii)-1,2,4-triazolic chains with spin crossover assembled from discrete trinuclear complexes
Source: Royal Society of Chemistry journal article supplement (doi:10.1039/d2dt00004k), 2022-01-01
Supplement: d2dt00004k1.pdf [file d2dt00004k1.pdf]

## Electronic supplementary information

### 1D iron(II)-1,2,4-triazolic chains with spin crossover assembled from discrete trinuclear complexes

Sergii I. Shylin,<sup>a,b</sup> Sergiu Shova,<sup>c</sup> Helena J. Shepherd,<sup>d</sup> Vadim Ksenofontov,<sup>e</sup> Wolfgang Tremel,<sup>e</sup>  
Il'ya A. Gural'skiy\*<sup>a</sup>

<sup>a</sup> Department of Chemistry, Taras Shevchenko National University of Kyiv, Volodymyrska 64, 01601 Kyiv, Ukraine; e-mail: illia.guralskyi@univ.kiev.ua

<sup>b</sup> Department of Chemistry – Ångström Laboratory, Uppsala University, PO Box 523, 75120 Uppsala, Sweden

<sup>c</sup> Petru Poni Institute of Macromolecular Chemistry, Aleea Gr. Ghica Voda 41A, 700487 Iasi, Romania

<sup>d</sup> Supramolecular, Interfacial & Synthetic Chemistry Group, School of Physical Sciences, University of Kent, Canterbury CT2 7NH, UK

<sup>e</sup> Institute of Inorganic and Analytical Chemistry, Johannes Gutenberg University of Mainz, Duesbergweg 10-14, 55128 Mainz, Germany

#### Table of contents

|                                           |    |
|-------------------------------------------|----|
| Figure S1. Alternative crystal structures | S2 |
| Figure S2. Disorder of anions             | S5 |
| Figure S3. Crystal packing                | S6 |
| Figure S4. SCO curve                      | S7 |
| Crystallographic tables                   | S8 |

**Figure S1.** Possible contacts between the discrete complexes based on their nuclearity. Colour code: Fe, green; N, blue; O, red; C, gray; H, light-gray. Non-O H atoms are not shown. Selected hydrogen bonds are shown as dashed lines.

**[Fe4] – [Fe4]:**

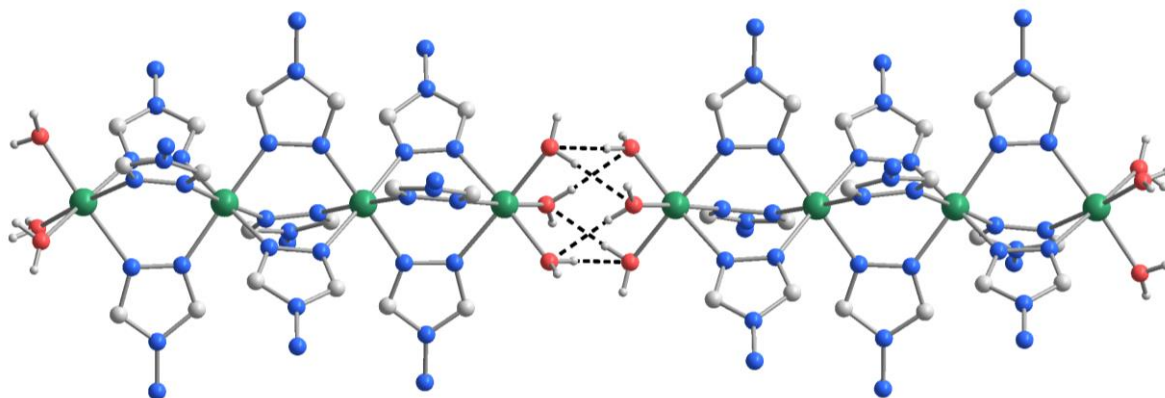

**[Fe4] – [Fe3]:**

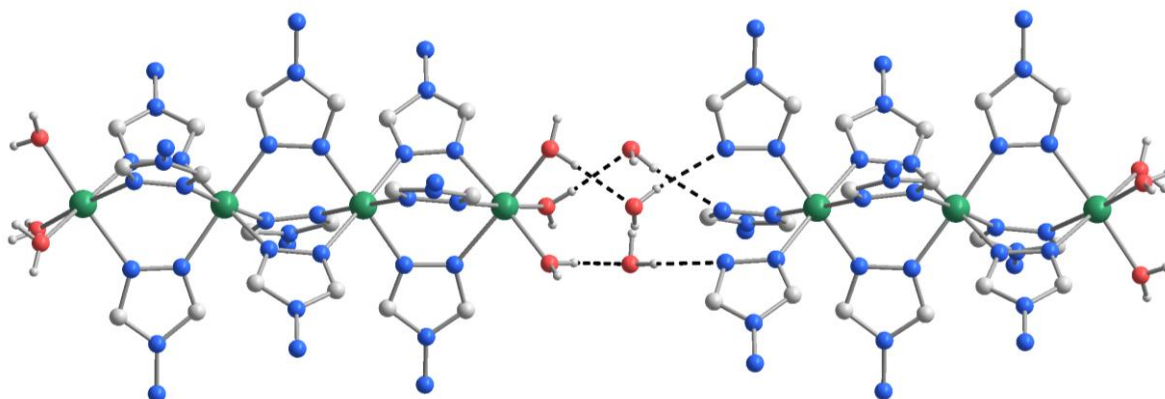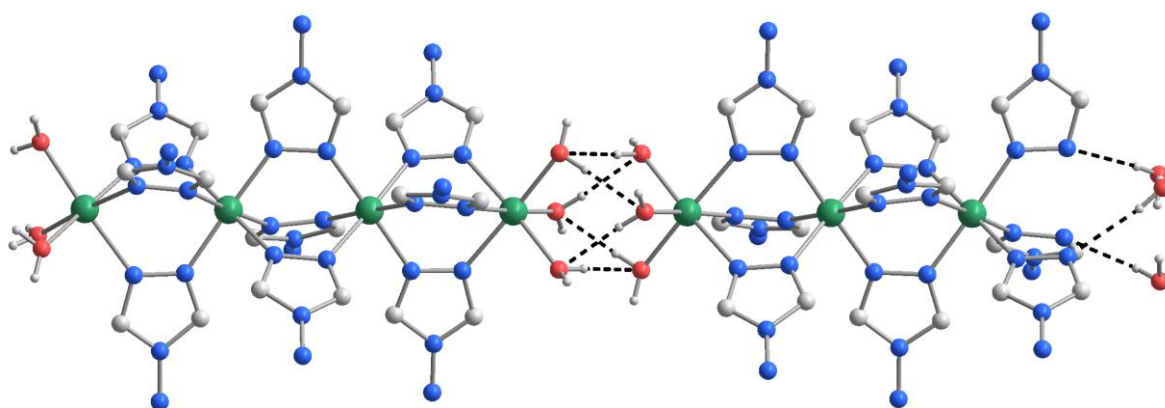

[Fe4] – [Fe2]:

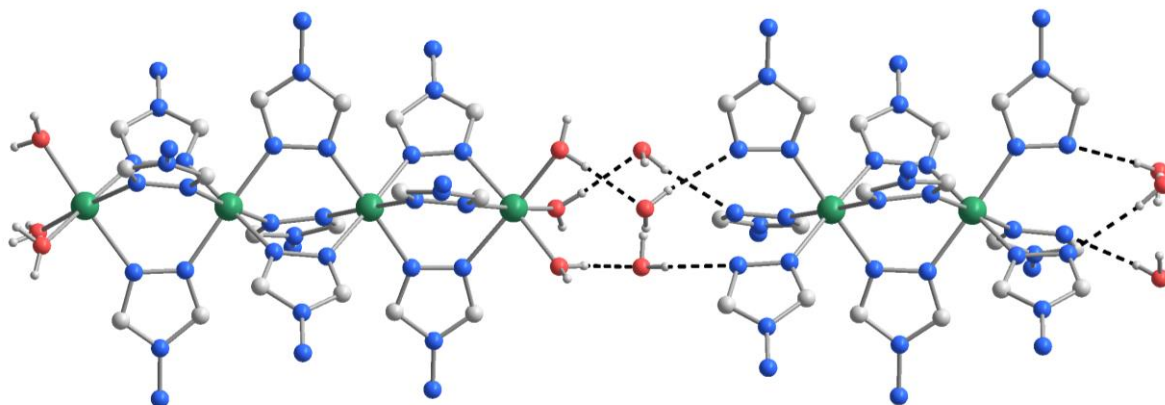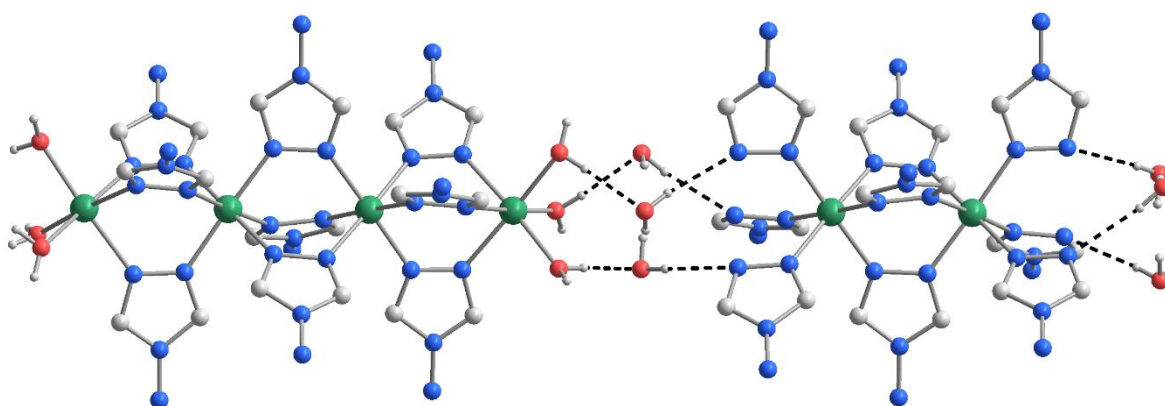

[Fe3] – [Fe3]:

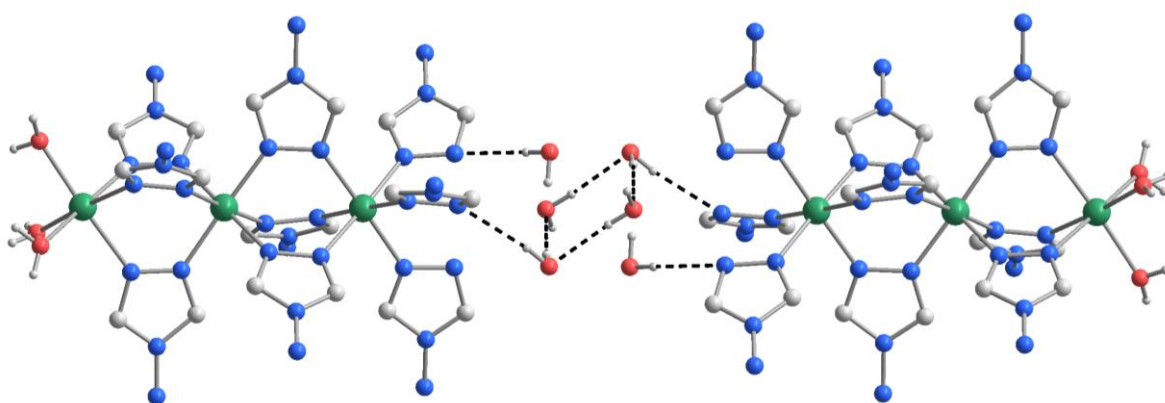

[Fe3] – [Fe2]:

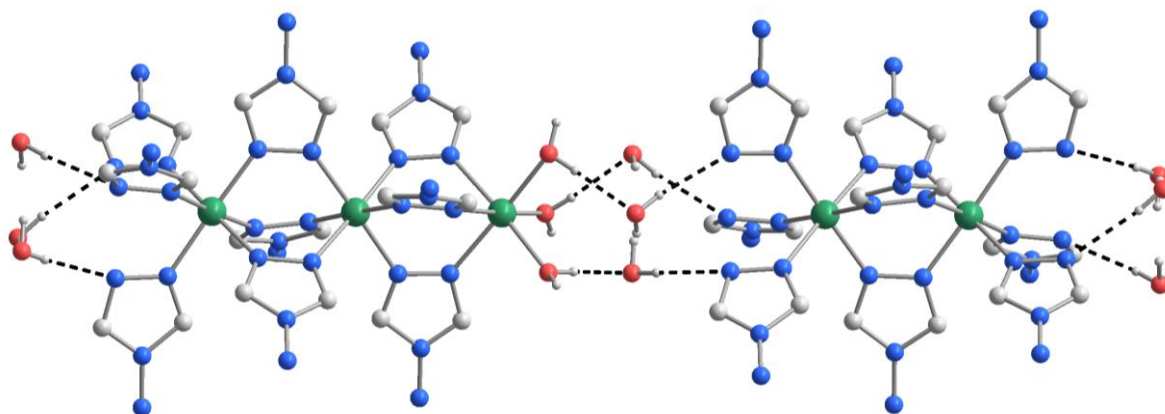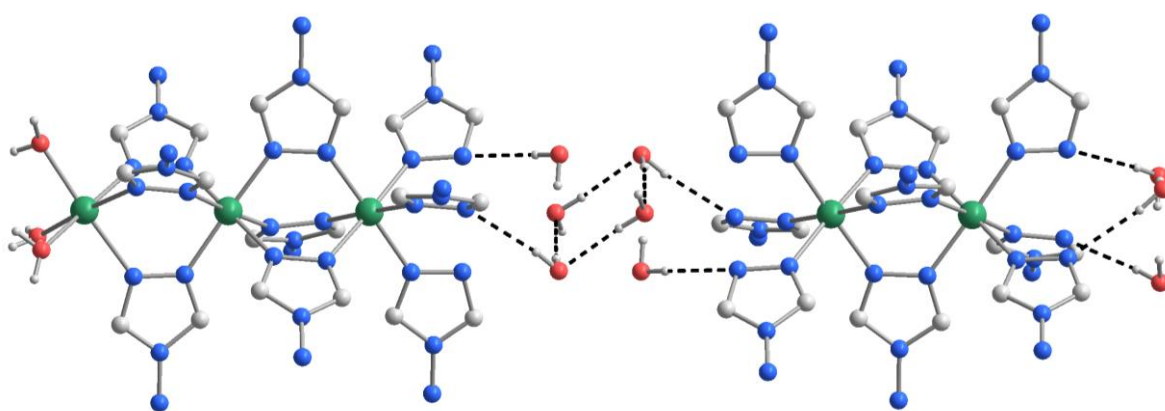

[Fe2] – [Fe2]:

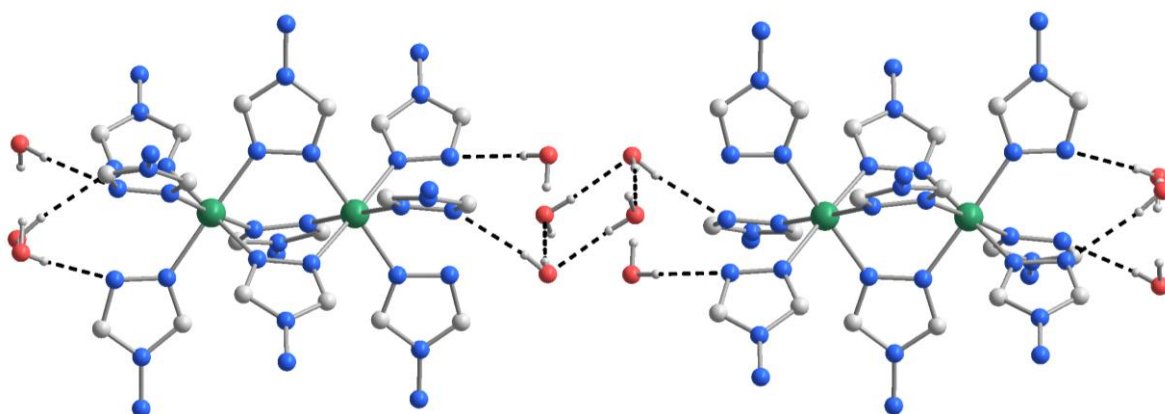

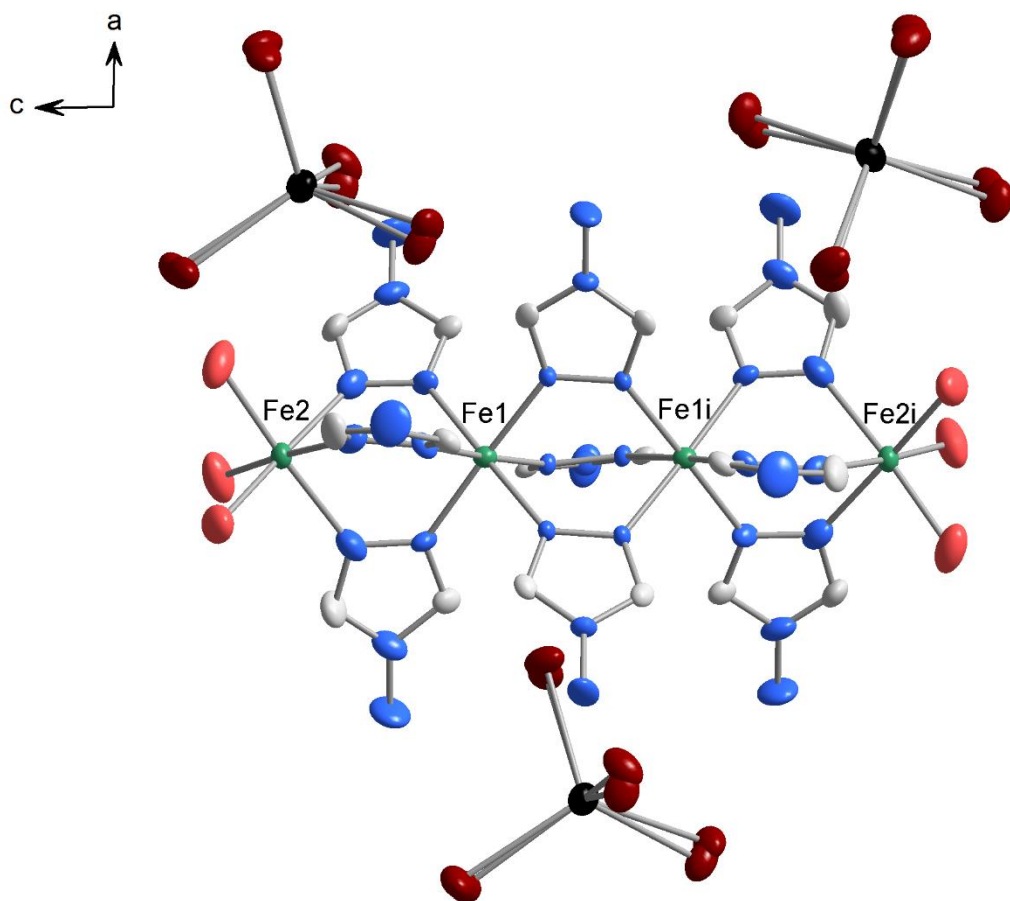

**Figure S2.** Fragment of the crystal structure of **1** with atomic displacement parameters drawn at 50% probability showing the molecular unit. The occupancies of Fe2 and all I atoms are 0.5. The occupancies of all other atoms are full. Colour code: Fe, green; N, blue; O, red; C, gray; Hg, black; I, brown.

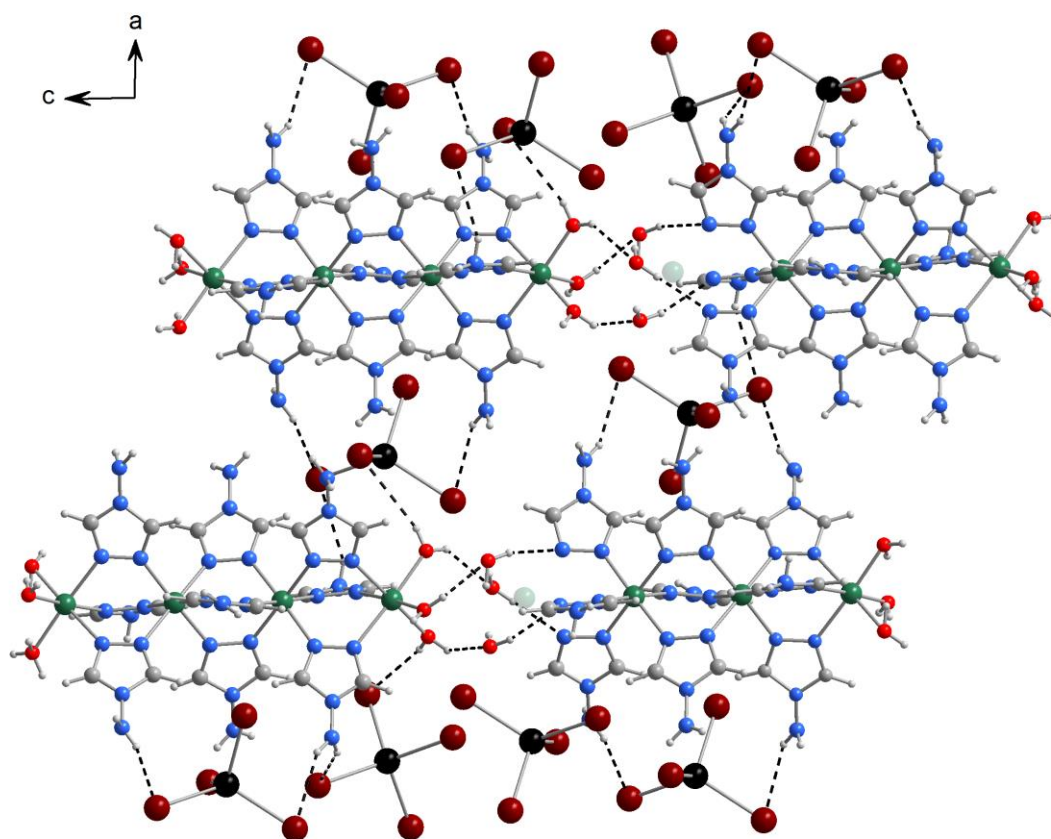

**Figure S3.** Crystal structure of **1** showing hydrogen bonds O–H $\cdots$ O, O–H $\cdots$ N and weak contacts N–H $\cdots$ I as black dashed lines. Colour code: Fe, green; N, blue; O, red; C, gray; H, light-gray; Hg, black; I, brown.

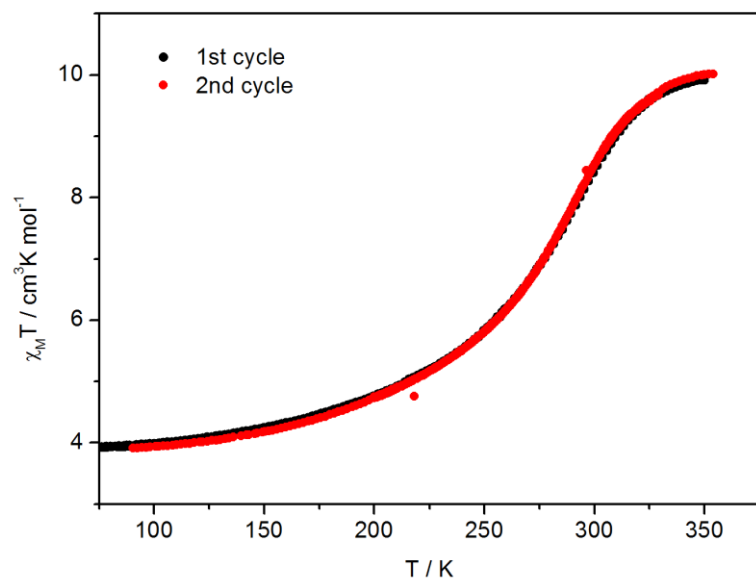

**Figure S4.** SCO curve of **1** recorded in two subsequent cycles of cooling and heating.

*Crystal data for 1*

|                                                                                      |                                                         |
|--------------------------------------------------------------------------------------|---------------------------------------------------------|
| $3(\text{HgI}_4) \cdot 1(\text{C}_{18}\text{H}_{48}\text{Fe}_3\text{N}_3\text{O}_6)$ | $D_x = 3.121 \text{ Mg m}^{-3}$                         |
| $M_r = 3156.98$                                                                      | Mo $K\alpha$ radiation, $\lambda = 0.71073 \text{ \AA}$ |
| Trigonal, $R\bar{3}c$                                                                | Cell parameters from 3424 reflections                   |
| $a = 19.2123 (15) \text{ \AA}$                                                       | $q = 2.8\text{--}25.0^\circ$                            |
| $c = 31.531 (3) \text{ \AA}$                                                         | $m = 13.04 \text{ mm}^{-1}$                             |
| $V = 10079.3 (18) \text{ \AA}^3$                                                     | $T = 173 \text{ K}$                                     |
| $Z = 6.0$                                                                            | Block, pink                                             |
| $F(000) = 8460$                                                                      | $0.09 \times 0.07 \times 0.05 \text{ mm}$               |

*Data collection*

|                                                                                            |                                                              |
|--------------------------------------------------------------------------------------------|--------------------------------------------------------------|
| Bruker SMART diffractometer                                                                | $R_{\text{int}} = 0.082$                                     |
| Absorption correction: multi-scan<br>c.f. r.h. blessing, acta cryst. (1995), a51,<br>33-38 | $q_{\text{max}} = 26.4^\circ$ , $q_{\text{min}} = 1.8^\circ$ |
| $T_{\text{min}} = 0.452$ , $T_{\text{max}} = 0.599$                                        | $h = -24 - 12$                                               |
| 20510 measured reflections                                                                 | $k = -11 - 23$                                               |
| 2313 independent reflections                                                               | $l = -39 - 39$                                               |
| 1799 reflections with $I > 2s(I)$                                                          |                                                              |

*Refinement*

|                            |                                                                                   |
|----------------------------|-----------------------------------------------------------------------------------|
| Refinement on $F^2$        | Primary atom site location: structure-invariant direct methods                    |
| Least-squares matrix: full | Hydrogen site location: mixed                                                     |
| $R[F^2 > 2s(F^2)] = 0.067$ | H-atom parameters constrained                                                     |
| $wR(F^2) = 0.158$          | $w = 1/[s^2(F_o^2) + (0.0314P)^2 + 1070.9049P]$<br>where $P = (F_o^2 + 2F_c^2)/3$ |
| $S = 1.22$                 | $(D/s)_{\text{max}} < 0.001$                                                      |
| 2313 reflections           | $D\rho_{\text{max}} = 2.35 \text{ e \AA}^{-3}$                                    |
| 139 parameters             | $D\rho_{\text{min}} = -1.36 \text{ e \AA}^{-3}$                                   |
| 0 restraints               |                                                                                   |



*Fractional atomic coordinates and isotropic or equivalent isotropic displacement parameters ( $\text{\AA}^2$ )*

|      | <i>x</i>    | <i>y</i>    | <i>z</i>     | $U_{\text{iso}}^*/U_{\text{eq}}$ | Occ. (<1) |
|------|-------------|-------------|--------------|----------------------------------|-----------|
| Hg1  | 0.29329 (5) | 0.333333    | 0.583333     | 0.0395 (3)                       |           |
| I2A  | 0.2000 (8)  | 0.2857 (8)  | 0.5094 (4)   | 0.047 (2)                        | 0.5       |
| Fe1  | 0.333333    | 0.666667    | 0.47523 (11) | 0.0212 (7)                       |           |
| Fe2  | 0.333333    | 0.666667    | 0.5946 (2)   | 0.0255 (16)                      | 0.5       |
| N5   | 0.3383 (7)  | 0.5832 (7)  | 0.4387 (3)   | 0.022 (2)                        |           |
| N2   | 0.4312 (10) | 0.6825 (10) | 0.5533 (5)   | 0.051 (4)                        |           |
| N6   | 0.333333    | 0.4745 (9)  | 0.416667     | 0.030 (4)                        |           |
| N3   | 0.5408 (10) | 0.6887 (10) | 0.5306 (6)   | 0.050 (4)                        |           |
| N1   | 0.4265 (8)  | 0.6757 (8)  | 0.5107 (4)   | 0.033 (3)                        |           |
| N7   | 0.333333    | 0.4010 (11) | 0.416667     | 0.060 (7)                        |           |
| H7   | 0.310870    | 0.366087    | 0.398570     | 0.071*                           |           |
| C3   | 0.3411 (9)  | 0.5195 (10) | 0.4508 (5)   | 0.029 (3)                        |           |
| H3   | 0.347710    | 0.507181    | 0.479142     | 0.035*                           |           |
| C1   | 0.4913 (10) | 0.6783 (10) | 0.4974 (6)   | 0.037 (4)                        |           |
| H1   | 0.502783    | 0.673650    | 0.468551     | 0.044*                           |           |
| O1   | 0.2341 (12) | 0.6456 (12) | 0.6318 (5)   | 0.094 (6)                        |           |
| H1AA | 0.231416    | 0.671165    | 0.652796     | 0.141*                           | 0.5       |
| H1AB | 0.187536    | 0.624765    | 0.621316     | 0.141*                           | 0.5       |
| H1BC | 0.248166    | 0.674845    | 0.609526     | 0.141*                           | 0.5       |
| H1BD | 0.257286    | 0.617155    | 0.634146     | 0.141*                           | 0.5       |
| C2   | 0.5016 (14) | 0.6887 (14) | 0.5636 (6)   | 0.055 (6)                        |           |
| H2   | 0.520392    | 0.692756    | 0.591827     | 0.066*                           |           |
| N4   | 0.6142 (11) | 0.6938 (14) | 0.5302 (7)   | 0.079 (6)                        |           |
| H4A  | 0.643674    | 0.683409    | 0.514774     | 0.095*                           |           |
| H4B  | 0.644834    | 0.742779    | 0.534914     | 0.095*                           |           |
| I1A  | 0.4346 (6)  | 0.4710 (6)  | 0.5607 (3)   | 0.0453 (15)                      | 0.5       |
| I2B  | 0.1956 (8)  | 0.3019 (7)  | 0.5139 (4)   | 0.048 (2)                        | 0.5       |
| I1B  | 0.4484 (6)  | 0.4578 (7)  | 0.5600 (4)   | 0.0495 (19)                      | 0.5       |

Atomic displacement parameters ( $\text{\AA}^2$ )

|     | $U^{11}$       | $U^{22}$       | $U^{33}$       | $U^{12}$       | $U^{13}$       | $U^{23}$       |
|-----|----------------|----------------|----------------|----------------|----------------|----------------|
| Hg1 | 0.0426 (6)     | 0.0412 (4)     | 0.0351 (5)     | 0.0213 (3)     | -0.0076<br>(4) | -0.0038<br>(2) |
| I2A | 0.069 (5)      | 0.043 (4)      | 0.040 (2)      | 0.035 (3)      | 0.009 (2)      | -0.002 (2)     |
| Fe1 | 0.0196<br>(10) | 0.0196<br>(10) | 0.0245<br>(17) | 0.0098 (5)     | 0.000          | 0.000          |
| Fe2 | 0.029 (2)      | 0.029 (2)      | 0.019 (3)      | 0.0144<br>(12) | 0.000          | 0.000          |
| N5  | 0.025 (6)      | 0.022 (6)      | 0.017 (6)      | 0.012 (5)      | 0.002 (5)      | 0.001 (5)      |
| N2  | 0.055 (10)     | 0.046 (10)     | 0.052 (10)     | 0.026 (8)      | -0.019 (8)     | -0.008 (8)     |
| N6  | 0.032 (10)     | 0.023 (7)      | 0.038 (11)     | 0.016 (5)      | 0.002 (8)      | 0.001 (4)      |
| N3  | 0.048 (10)     | 0.045 (9)      | 0.068 (11)     | 0.031 (8)      | -0.017 (9)     | -0.004 (8)     |
| N1  | 0.024 (7)      | 0.037 (8)      | 0.037 (8)      | 0.015 (6)      | 0.009 (6)      | 0.011 (6)      |
| N7  | 0.10 (2)       | 0.041 (9)      | 0.055 (15)     | 0.051 (11)     | 0.013 (14)     | 0.006 (7)      |
| C3  | 0.018 (7)      | 0.035 (9)      | 0.030 (8)      | 0.010 (7)      | 0.007 (6)      | 0.008 (7)      |
| C1  | 0.036 (10)     | 0.034 (9)      | 0.042 (10)     | 0.019 (8)      | 0.005 (8)      | 0.013 (8)      |
| O1  | 0.127 (17)     | 0.136 (18)     | 0.056 (10)     | 0.091 (15)     | 0.028 (11)     | 0.027 (11)     |
| C2  | 0.075 (15)     | 0.074 (15)     | 0.037 (11)     | 0.053 (13)     | -0.009<br>(11) | 0.006 (10)     |
| N4  | 0.056 (12)     | 0.117 (18)     | 0.091 (15)     | 0.064 (13)     | -0.017<br>(11) | -0.006<br>(14) |
| I1A | 0.034 (3)      | 0.064 (4)      | 0.047 (3)      | 0.031 (3)      | -0.001 (2)     | -0.005 (3)     |
| I2B | 0.056 (4)      | 0.061 (6)      | 0.041 (4)      | 0.039 (4)      | -0.011 (3)     | -0.015 (3)     |
| I1B | 0.045 (4)      | 0.057 (4)      | 0.059 (3)      | 0.035 (4)      | 0.013 (3)      | 0.022 (4)      |

Geometric parameters ( $\text{\AA}$ ,  $^\circ$ )

|                       |            |                     |            |
|-----------------------|------------|---------------------|------------|
| Hg1—I2A <sup>i</sup>  | 2.801 (14) | N5—C3               | 1.310 (19) |
| Hg1—I2A               | 2.802 (15) | N2—N1               | 1.35 (2)   |
| Hg1—I1A <sup>i</sup>  | 2.774 (10) | N2—C2               | 1.34 (3)   |
| Hg1—I1A               | 2.774 (11) | N6—N7               | 1.41 (3)   |
| Hg1—I2B               | 2.747 (14) | N6—C3 <sup>iv</sup> | 1.340 (19) |
| Hg1—I2B <sup>i</sup>  | 2.746 (14) | N6—C3               | 1.340 (19) |
| Hg1—I1B               | 2.831 (12) | N3—C1               | 1.36 (2)   |
| Hg1—I1B <sup>i</sup>  | 2.831 (11) | N3—C2               | 1.29 (3)   |
| Fe1—N5 <sup>ii</sup>  | 2.015 (12) | N3—N4               | 1.36 (2)   |
| Fe1—N5 <sup>iii</sup> | 2.015 (12) | N1—C1               | 1.29 (2)   |

|                                          |             |                                          |             |
|------------------------------------------|-------------|------------------------------------------|-------------|
| Fe1—N5                                   | 2.015 (11)  | N7—H7 <sup>iv</sup>                      | 0.8202      |
| Fe1—N1 <sup>iii</sup>                    | 2.043 (14)  | N7—H7                                    | 0.8201      |
| Fe1—N1 <sup>ii</sup>                     | 2.043 (14)  | C3—H3                                    | 0.9500      |
| Fe1—N1                                   | 2.043 (14)  | C1—H1                                    | 0.9500      |
| Fe2—N2 <sup>ii</sup>                     | 2.178 (19)  | O1—H1AA                                  | 0.8406      |
| Fe2—N2 <sup>iii</sup>                    | 2.178 (18)  | O1—H1AB                                  | 0.8434      |
| Fe2—N2                                   | 2.178 (18)  | O1—H1BC                                  | 0.8554      |
| Fe2—O1 <sup>iii</sup>                    | 2.100 (18)  | O1—H1BD                                  | 0.8638      |
| Fe2—O1                                   | 2.100 (18)  | C2—H2                                    | 0.9500      |
| Fe2—O1 <sup>ii</sup>                     | 2.100 (18)  | N4—H4A                                   | 0.8427      |
| N5—N5 <sup>iv</sup>                      | 1.40 (2)    | N4—H4B                                   | 0.8368      |
| I2A—Hg1—I2A <sup>i</sup>                 | 123.1 (4)   | O1 <sup>iii</sup> —Fe2—N2 <sup>iii</sup> | 176.4 (7)   |
| I2A <sup>i</sup> —Hg1—I1B <sup>i</sup>   | 106.9 (4)   | O1—Fe2—N2 <sup>ii</sup>                  | 88.4 (7)    |
| I2A—Hg1—I1B <sup>i</sup>                 | 108.1 (3)   | O1 <sup>ii</sup> —Fe2—N2                 | 91.8 (6)    |
| I1A <sup>i</sup> —Hg1—I1A                | 119.8 (3)   | O1 <sup>ii</sup> —Fe2—O1 <sup>iii</sup>  | 91.7 (7)    |
| I1A <sup>i</sup> —Hg1—I1B <sup>i</sup>   | 9.2 (2)     | O1—Fe2—O1 <sup>iii</sup>                 | 91.7 (7)    |
| I1A <sup>i</sup> —Hg1—I1B                | 110.78 (14) | O1—Fe2—O1 <sup>ii</sup>                  | 91.7 (7)    |
| I1A—Hg1—I1B                              | 9.2 (2)     | N5 <sup>iv</sup> —N5—Fe1                 | 124.3 (4)   |
| I1A—Hg1—I1B <sup>i</sup>                 | 110.78 (14) | C3—N5—Fe1                                | 128.1 (10)  |
| I2B—Hg1—I1A                              | 103.9 (3)   | C3—N5—N5 <sup>iv</sup>                   | 107.1 (9)   |
| I2B <sup>i</sup> —Hg1—I1A                | 109.6 (3)   | N1—N2—Fe2                                | 124.8 (12)  |
| I2B <sup>i</sup> —Hg1—I2B                | 110.0 (4)   | C2—N2—Fe2                                | 129.2 (14)  |
| I2B—Hg1—I1B <sup>i</sup>                 | 115.4 (3)   | C2—N2—N1                                 | 105.3 (16)  |
| I2B—Hg1—I1B                              | 107.1 (3)   | C3 <sup>iv</sup> —N6—N7                  | 126.1 (9)   |
| I2B <sup>i</sup> —Hg1—I1B                | 115.4 (3)   | C3—N6—N7                                 | 126.1 (9)   |
| I2B <sup>i</sup> —Hg1—I1B <sup>i</sup>   | 107.1 (3)   | C3—N6—C3 <sup>iv</sup>                   | 107.8 (19)  |
| I1B—Hg1—I1B <sup>i</sup>                 | 101.9 (3)   | C1—N3—N4                                 | 128.8 (18)  |
| N5 <sup>ii</sup> —Fe1—N5 <sup>iii</sup>  | 90.5 (5)    | C2—N3—C1                                 | 104.8 (16)  |
| N5 <sup>ii</sup> —Fe1—N5                 | 90.5 (5)    | C2—N3—N4                                 | 126.2 (18)  |
| N5 <sup>iii</sup> —Fe1—N5                | 90.5 (5)    | N2—N1—Fe1                                | 124.5 (11)  |
| N5 <sup>ii</sup> —Fe1—N1 <sup>iii</sup>  | 87.0 (5)    | C1—N1—Fe1                                | 127.8 (12)  |
| N5 <sup>iii</sup> —Fe1—N1 <sup>ii</sup>  | 177.5 (5)   | C1—N1—N2                                 | 107.7 (15)  |
| N5—Fe1—N1                                | 89.6 (5)    | N6—N7—H7 <sup>iv</sup>                   | 123.712 (8) |
| N5 <sup>iii</sup> —Fe1—N1                | 87.0 (5)    | N6—N7—H7                                 | 123.7       |
| N5 <sup>iii</sup> —Fe1—N1 <sup>iii</sup> | 89.6 (5)    | H7—N7—H7 <sup>iv</sup>                   | 112.6       |
| N5 <sup>ii</sup> —Fe1—N1 <sup>ii</sup>   | 89.6 (5)    | N5—C3—N6                                 | 109.0 (14)  |
| N5—Fe1—N1 <sup>ii</sup>                  | 87.0 (5)    | N5—C3—H3                                 | 125.5       |

|                                         |             |                            |             |
|-----------------------------------------|-------------|----------------------------|-------------|
| N5 <sup>ii</sup> —Fe1—N1                | 177.5 (5)   | N6—C3—H3                   | 125.5       |
| N5—Fe1—N1 <sup>iii</sup>                | 177.5 (5)   | N3—C1—H1                   | 124.9       |
| N1 <sup>iii</sup> —Fe1—N1               | 92.9 (5)    | N1—C1—N3                   | 110.2 (16)  |
| N1 <sup>ii</sup> —Fe1—N1                | 92.9 (5)    | N1—C1—H1                   | 124.9       |
| N1 <sup>iii</sup> —Fe1—N1 <sup>ii</sup> | 92.9 (5)    | Fe2—O1—H1AA                | 129.9       |
| N2 <sup>iii</sup> —Fe2—N2               | 88.0 (6)    | Fe2—O1—H1AB                | 121.1       |
| N2 <sup>ii</sup> —Fe2—N2                | 88.0 (6)    | H1AA—O1—H1AB               | 103.1       |
| N2 <sup>iii</sup> —Fe2—N2 <sup>ii</sup> | 88.0 (6)    | H1BC—O1—H1BD               | 113.0       |
| O1 <sup>ii</sup> —Fe2—N2 <sup>iii</sup> | 88.4 (7)    | N2—C2—H2                   | 124.1       |
| O1—Fe2—N2 <sup>iii</sup>                | 91.8 (6)    | N3—C2—N2                   | 111.8 (18)  |
| O1 <sup>ii</sup> —Fe2—N2 <sup>ii</sup>  | 176.4 (7)   | N3—C2—H2                   | 124.1       |
| O1 <sup>iii</sup> —Fe2—N2               | 88.4 (7)    | N3—N4—H4A                  | 141.2       |
| O1 <sup>iii</sup> —Fe2—N2 <sup>ii</sup> | 91.8 (6)    | N3—N4—H4B                  | 101.5       |
| O1—Fe2—N2                               | 176.4 (7)   | H4A—N4—H4B                 | 101.0       |
| Fe1—N5—C3—N6                            | 172.1 (8)   | N7—N6—C3—N5                | -179.9 (7)  |
| Fe1—N1—C1—N3                            | 176.8 (11)  | C3 <sup>iv</sup> —N6—C3—N5 | 0.1 (7)     |
| Fe2—N2—N1—Fe1                           | 10 (2)      | C1—N3—C2—N2                | -3 (2)      |
| Fe2—N2—N1—C1                            | -171.7 (12) | C2—N2—N1—Fe1               | -178.5 (13) |
| Fe2—N2—C2—N3                            | 172.8 (13)  | C2—N2—N1—C1                | 0 (2)       |
| N5 <sup>iv</sup> —N5—C3—N6              | -0.2 (18)   | C2—N3—C1—N1                | 2 (2)       |
| N2—N1—C1—N3                             | -1.4 (19)   | N4—N3—C1—N1                | 179.4 (19)  |
| N1—N2—C2—N3                             | 2 (2)       | N4—N3—C2—N2                | -179.7 (19) |

Symmetry codes: (i)  $x-y+1/3$ ,  $-y+2/3$ ,  $-z+7/6$ ; (ii)  $-x+y$ ,  $-x+1$ ,  $z$ ; (iii)  $-y+1$ ,  $x-y+1$ ,  $z$ ; (iv)  $-x+2/3$ ,  $-x+y+1/3$ ,  $-z+5/6$ .
